# Supplementary material for: Genome-wide bimolecular fluorescence complementation analysis of SUMO interactome in yeast
Source: HighWire-hosted journal article supplement (doi:10.1101/gr.148346.112), 2013-02-12
Supplement: Supplemental_Material.docx [file Supplemental_Material.docx]

**SUPPLEMENTAL MATERIAL**

**SUPPLEMENTAL FIGURE LEGENDS**

**Figure S1.** Western blot analysis to confirm correct switching of the VN tag from the TAP tag. Both the host cells expressing the corresponding C-terminally TAP-tagged proteins and the VN-switched cells were grown to mid-log phase in YPD medium at 30°C. Total proteins were extracted, and immunoblotting was performed with HRP-conjugated anti-mouse IgG and anti-GFP antibodies. TAP indicates the host strain carrying the corresponding C-terminally TAP-tagged protein. VN indicates the epitope-switched strain carrying the corresponding C-terminally VN-tagged protein.

Figure S2. The biological function of Smt3 is not disturbed by tagging VC at the N-terminus of Smt3. (*A*) The growth of untagged control BY4742 cells and HY1121 cells with N-terminally VC-tagged Smt3 was analyzed by spotting cells in serial 10-fold dilutions on SC plates, followed by incubation for 3 days at the indicated temperature. (*B*) The sumoylation pattern of BY4742 and HY1121 cells was analyzed by immunoprecipitation. Cells were grown to mid-log phase in YPD medium at 30°C, and total proteins were extracted. The immunoprecipitated SUMO-modified fraction was probed with an anti-Smt3 antibody. The positions of the molecular weight markers are indicated on the right.

**Figure S3.** Network diagram summarizing 408 BiFC-positive proteins selected in the first screening judged by occurrence of fluorescence. Proteins were sorted v­ertically by their subcellular localization ([Huh et al. 2003](#_ENREF_2)) and horizontally by their GO biological process (some were manually annotated from the literature for simplicity). Proteins marked blue with solid lines (280) and red with dashed lines (87) indicate class I and class II SUMO targets, respectively, while those marked gray (41) represent proteins identified as false-positives in this study. The squares (255) indicate newly identified SUMO target candidates in this study. The circles (153) represent proteins overlapping with the 781SUMO targets identified in previous proteomic studies. The italics (10) indicate proteins manually annotated from the yeast GFP fusion localization database.

Figure S4. Confirmation of SUMO targets identified in this study.Yeast strains expressing the corresponding GFP fusion proteins were grown to mid-log phase in YPD medium at 30°C. Total proteins were extracted, and the fraction immunoprecipitated with or without an anti-Smt3 antibody was probed with an anti-GFP antibody. The numbers on each panel indicate the FVC-Smt3/FVC and FVC-Smt3/FVC-Smt3ΔGG values for each protein. The positions of the molecular weight markers are indicated in kilodaltons on the right of each panel. Arrowheads and asterisks indicate SUMO-modified and native protein bands, respectively. Six proteins for which we failed to detect protein bands in the immunoprecipitated fractions are written in gray. In, total protein lysate; -, immunoprecipitation without anti-Smt3 antibody; +, immunoprecipitation with anti-Smt3 antibody.

Figure S5. Visualization of SUMO interaction by tagging VN at the N-terminus of target proteins. Cells co-expressing the N-terminally VN-tagged proteins and VC-tagged Smt3 were grown to mid-log phase in SC medium and analyzed for BiFC.

Figure S6. The fluorescence intensity of GFP fusions of 12 proteins and Smt3 is not significantly influenced by hydroxyurea or nocodazole treatment. Cells expressing the corresponding GFP fusion proteins were grown to mid-log phase in SC medium, treated with 0.2 M hydroxyurea or 15 μg/ml nocodazole, and incubated for 3 hr. HU and NCD indicate the treatments with hydroxyurea and nocodazole, respectively.

Table S1. Oligonucleotide primers used in this study.

| **Primer** | **Sequence** |
| --- | --- |
| P1 | 5′-ACTG***TCTAGA***ATGCGTCCGGCGTGCAAAATCC-3′ |
| P2 | 5′-GTCA***CTCGAG***TCCTAATACGTAGCACCACC-3′ |
| P3 | 5′-GTCA***CTCGAG***CTAACCAATCTGTTCTCTGTGAG-3′ |
| P4 | 5′-CAGA***GAATTC***CTATGAGTTTAATTAACCGTCC-3′ |
| P5 | 5′-GTCA***CTCGAG***ATTCGCTTATTTAGAAGTGG-3′ |
| P6 | 5′-TCAG***TCTAGA***AAGGTCCACGTCAGTTCCAC-3′ |
| P7 | 5′-AGTC***AAGCTT***GATAAACATTTTTTATCAACACTATG-3′ |
| P8 | 5′-ACTG***TCTAGA***GTTCATTAGTTCCATGCCTC-3′ |
| P9 | 5′-TAACCACCATTTGATG***CTCG***-3′ |
| P10 | 5′-CAGT***GAGCTC***G***TTAATTAA***CCCGGGGATCC-3′ |
| P11 | 5′-ACTG***TCTAGA***CCCACATATATGTCTGCCAG-3′ |
| P12 | 5′-GTCA***CTCGAG***TTCAAGGGTCTTCATCTTCC-3′ |
| P13 | 5′-AGATATTGTCTACTTGCCTG-3′ |
| P14 | 5′-GTCA***CTCGAG***ATTCGCTTATTTAGAAGTGG-3′ |
| P15 | 5′-CAGT***GAATTC***AACATGAGCGGTGAATTAGC-3′ |
| P16 | 5′-CGCCATTGAGGAAAGCTTGG-3′ |
| F2CORE | 5′-GGTCGACGGATCCCCGGGTT-3′ |
| R1CORE | 5′-TCGATGAATTCGAGCTCGTT-3′ |
| AOS1-F4 | 5′-TATCAATTAAAGTAAAAGAAGAACAAACTGAGTGGATTAAGAATTCGAGCTCGTTTAAAC-3′ |
| AOS1-R5-VN | 5′-CAATTTCATCTTCACTTAATTTTTCTACTTTCATATCCATACCACCAGAACCCTCGATGTTGTGGCGGATC-3′ |
| CDC3-F4 | 5′-CCAGGATCACACGACAACTGAACGATTACATCGGCCTATAGAATTCGAGCTCGTTTAAAC-3′ |
| CDC3-R5-VN | 5′-GGTCCTGCTTAATGGACACTTGTTCCTCCTTTAAACTCATACCACCAGAACCCTCGATGTTGTGGCGGATC-3′ |
| HSP82-F4 | 5′-AATCATACCTGATAGAAAATAGAGTCCTATAAACAAAAGCGAATTCGAGCTCGTTTAAAC-3′ |
| HSP82-R5-VN | 5′-GAGTAATTTCAGCTTGAAATTCAAAAGTTTCACTAGCCATACCACCAGAACCCTCGATGTTGTGGCGGATC-3′ |
| HTB1-F4 | 5′-TTTATCCTATATAGACAAGTCAAACCACAAATAAACCATAGAATTCGAGCTCGTTTAAAC-3′ |
| HTB1-R5-VN | 5′-GGGCTTTGGAGGCTGGTTTCTTTTCGGCTTTAGCAGACATACCACCAGAACCCTCGATGTTGTGGCGGATC-3′ |
| POL30-F4 | 5′-CACTCACAGCAACAAGCAGCAAGCACTAAGTACGCAGTCAGAATTCGAGCTCGTTTAAAC-3′ |
| POL30-R5-VN | 5′-TCTTGAAAAGGGATGCTTCTTCAAATTTTGCTTCTAACATACCACCAGAACCCTCGATGTTGTGGCGGATC-3′ |
| RAP1-F4 | 5′-ATACGCAACCGCCCTACATAAGACACTATTTGCGTACAGAGAATTCGAGCTCGTTTAAAC-3′ |
| RAP1-R5-VN | 5′-ATTCTGCTGGTGCAGTTTCAAAATCATCTGGACTAGACATACCACCAGAACCCTCGATGTTGTGGCGGATC-3′ |
| RSC58-F4 | 5′-ATCAGTCGGGATCAAATAAGAGATAATTTTGAAAATCGAAGAATTCGAGCTCGTTTAAAC-3′ |
| RSC58-R5-VN | 5′-AAAAATCTACTAGTTTATTTCCACCTACACTTTCTGTCATACCACCAGAACCCTCGATGTTGTGGCGGATC-3′ |
| TFG1-F4 | 5′-TTCGAAAGGTTGAAGAATAGCTAGGGAGGCCTATTCGAGTGAATTCGAGCTCGTTTAAAC-3′ |
| TFG1-R5-VN | 5′-CTCCCCCGTTTCTACTGCCTGGTGGATTGCGTCTGGACATACCACCAGAACCCTCGATGTTGTGGCGGATC-3′ |
| TOP1-F4 | 5′-AATCTAAAGGGAGGGCAGAGCTCGAAACTTGAAACGCGTAGAATTCGAGCTCGTTTAAAC-3′ |
| TOP1-R5-VN | 5′-ACAACTCATGATTAACTTTGGAAGCATCAGCAATAGTCATACCACCAGAACCCTCGATGTTGTGGCGGATC-3′ |
| UBC9-F4 | 5′-GAAGAGAAATTTAGCATAGGATAAGCACACACTGGCACCAGAATTCGAGCTCGTTTAAAC-3′ |
| UBC9-R5-VN | 5′-ACCTTTCTTCCTGAAGACGCTGTAGACACAAACTACTCATACCACCAGAACCCTCGATGTTGTGGCGGATC-3′ |
| CLB2-F2 | 5′-GGTTAGAAAAAACGGCTATGATATAATGACCTTGCATGAAGGTCGACGGATCCCCGGGTT-3′ |
| CLB2-R1 | 5′-CGATTATCGTTTTAGATATTTTAAGCATCTGCCCCTCTTCTCGATGAATTCGAGCTCGTT-3′ |

Sequences in bold italic represent the restriction enzyme sites for cloning of the PCR products.

**Table S3.** Functional classification of the SUMO interactome identified in this study.

|  |  |  | **Class I**  **(280)** | | **Class II**  **(87)** | | **SUMO interactome**  **(367)** | |
| --- | --- | --- | --- | --- | --- | --- | --- | --- |
|  | **GO ID** | **GO category description** | **proteins identified** | ***P*-value** | **proteins identified** | ***P*-value** | **proteins identified** | ***P*-value** |
| Chromatin Remodeling | 6323 | DNA packaging | 8 | 2.81E-01 | 5 | **4.56E-02** | 13 | 6.38E-02 |
| 6325 | chromatin organization | 16 | 2.70E-01 | 8 | **3.96E-02** | 24 | **3.32E-02** |
| 6333 | chromatin assembly or disassembly | 9 | 1.33E-01 | 5 | **3.74E-02** | 14 | **2.16E-02** |
| Metabolism | 8152 | metabolic process | 216 | **9.97E-06** | 77 | **2.11E-06** | 293 | **6.46E-10** |
| RNA metabolism | 6394 | RNA processing | 25 | 2.56E-01 | 20 | **9.09E-06** | 45 | **1.25E-03** |
| Cell cycle | 75 | cell cycle checkpoint | 6 | **4.12E-02** | - | - | 6 | 1.97E-01 |
| 7059 | chromosome segregation | 11 | 7.92E-02 | 5 | 6.36E-02 | 16 | **1.68E-02** |
| 51726 | regulation of cell cycle | 13 | **3.96E-02** | - | - | 13 | 1.17E-01 |
| Transcription | 10608 | posttranscriptional regulation of gene expression | 51 | **2.78E-10** | 11 | 5.13E-02 | 62 | **8.56E-11** |
| Ribosome | 22613 | ribonucleoprotein complex biogenesis | 70 | **1.35E-08** | 31 | **6.19E-08** | 101 | **9.43E-15** |
| Stress response | 6979 | response to oxidative stress | 19 | **2.02E-09** | - | - | 19 | **1.78E-07** |
| Nuclear transport | 51169 | nuclear transport | 12 | **2.33E-02** | 4 | 1.37E-01 | 16 | **8.19E-03** |
| Protein folding | 6458 | de novo protein folding | 4 | **1.81E-03** | 1 | 1.65E-01 | 5 | **5.05E-04** |
| Protein catabolism | 30162 | regulation of proteolysis | 2 | **2.03E-02** | - | - | 2 | **3.42E-02** |
| Translation | 6416 | translation | 69 | **1.49E-16** | 39 | **1.05E-19** | 108 | **1.59E-33** |
| Cellular component organization or biogenesis | 6996 | organelle organization | 98 | **1.09E-03** | 41 | **4.69E-05** | 139 | **1.14E-06** |

Overrepresented GO categories were identified with the Hypergeometric Test using BiNGO software ([Maere et al. 2005](#_ENREF_3)). Statistically significant GO category enrichment scores (*P<*0.05) are indicated in bold.

**Table S5.** Proteins showing changes in their subcellular localization and amount under overexpression of Ulps.

| **Protein** | **ORF** | **Ulps specificty**a | **Observed changes**b |
| --- | --- | --- | --- |
| Adk1 | YDR226W | Ulp1-specific | Decrease in nuclear GFP signal (Ulp1) |
| Ado1 | YJR105W | Ulp1-specific | Decrease in nuclear GFP signal (Ulp1) |
| Aha1 | YDR214W | Ulp1/Ulp2-specific | Decrease in nuclear GFP signal (Ulp1/Ulp2) |
| Ahp1 | YLR109W | Ulp1/Ulp2-specific | Decrease in nuclear GFP signal (Ulp1) |
| Aro3 | YDR035W | Ulp1-specific | Decrease in nuclear GFP signal (Ulp1) |
| Aro4 | YBR249C | Ulp1/Ulp2-specific | Decrease in nuclear GFP signal (Ulp1) |
| Bcp1 | YDR361C | Ulp1/Ulp2-specific | Decrease in nuclear GFP signal (Ulp1) |
| Bmh1 | YER177W | Ulp1-specific | Decrease in nuclear GFP signal (Ulp1) |
| Car1 | YPL111W | Ulp1/Ulp2-specific | Decrease in nuclear GFP signal (Ulp1) |
| Cdc28 | YBR160W | Ulp1-specific | Decrease in nuclear GFP signal (Ulp1) |
| Cks1 | YBR135W | Ulp1/Ulp2-specific | Decrease in nuclear GFP signal (Ulp1) |
| Hnt1 | YDL125C | Ulp1/Ulp2-specific | Decrease in nuclear GFP signal (Ulp1/Ulp2) |
| Idi1 | YPL117C | Ulp1/Ulp2-specific | Decrease in nuclear GFP signal (Ulp1/Ulp2) |
| Kti11 | YBL071W-A | Ulp2-specific | Decrease in nuclear GFP signal (Ulp2) |
| Leu1 | YGL009C | Ulp1-specific | Decrease in nuclear GFP signal (Ulp1) |
| Ser2 | YGR208W | Ulp1/Ulp2-specific | Decrease in nuclear GFP signal (Ulp1/Ulp2) |
| Sis1 | YNL007C | Ulp1/Ulp2-specific | Decrease in nuclear GFP signal (Ulp1) |
| Sqt1 | YIR012W | Ulp1/Ulp2-specific | Decrease in nuclear GFP signal (Ulp1) |
| Tdh2 | YJR009C | Ulp1/Ulp2-specific | Decrease in nuclear GFP signal (Ulp1/Ulp2) |
| Tma17 | YDL110C | Ulp1-specific | Decrease in nuclear GFP signal (Ulp1) |
| Trr1 | YDR353W | Ulp1-specific | Decrease in nuclear GFP signal (Ulp1) |
| Trx1 | YLR043C | Ulp1-specific | Decrease in nuclear GFP signal (Ulp1) |
| Trx2 | YGR209C | Ulp1-specific | Decrease in nuclear GFP signal (Ulp1) |
| Ydl085c-a | YDL085C-A | Ulp1/Ulp2-specific | Decrease in nuclear GFP signal (Ulp1) |
| Ydl124w | YDL124W | Ulp1-specific | Decrease in nuclear GFP signal (Ulp1) |
| Yer067w | YER067W | Ulp1-specific | Decrease in nuclear GFP signal (Ulp1) |
| Ymr099c | YMR099C | Ulp1-specific | Decrease in nuclear GFP signal (Ulp1) |
| Ald6 | YPL061W | Ulp2-specific | Decrease in GFP signal intensity (Ulp2) |
| Cpr1 | YDR155C | Ulp1/Ulp2-specific | Increase in GFP signal intensity (Ulp1/Ulp2) |
| Eno2 | YHR174W | Ulp1/Ulp2-specific | Increase in GFP signal intensity (Ulp1/Ulp2) |
| Ibi2 | YMR295C | Ulp1/Ulp2-specific | Decrease in GFP signal intensity (Ulp1) |
| Rpl41a | YDL184C | Ulp1-specific | Increase in GFP signal intensity (Ulp1) |
| Sam2 | YDR502C | Ulp1-specific | Increase in GFP signal intensity (Ulp1) |
| Shm2 | YLR058C | Ulp1/Ulp2-specific | Decrease in GFP signal intensity (Ulp1) |
| Ssb2 | YNL209W | Ulp2-specific | Increase in GFP signal intensity (Ulp2) |
| Tma10 | YLR327C | Ulp1-specific | Increase in GFP signal intensity (Ulp1) |
| Yor285w | YOR285W | Ulp1/Ulp2-specific | Decrease in GFP signal intensity (Ulp1/Ulp2) |

aBased on data from Fig. 4A and Supplemental Table 4.

bParentheses indicate Ulps that cause the observed changes upon overexpression.

Table S6. Yeast strains used in this study.

| Strain | | Genotype | | Source | |
| --- | --- | --- | --- | --- | --- |
| BY4741 | *MAT***a** *his3∆1 leu2*Δ*0 met15∆0 ura3∆0* | | Research genetics | |
| BY4742 | *MAT*α *his3∆1 leu2∆0 lys2∆0 ura3∆0* | | Research genetics | |
| HY0389 | *MAT*α *his3∆1 leu2∆0 lys2∆0 ura3∆0 His3MX6*::*PRPL7B-GFP-SMT3* | | ([Sung and Huh 2010](#_ENREF_4)) | |
| HY1121 | *MAT*α *his3∆1 leu2∆0 lys2∆0 ura3∆0 His3MX6*::*PCET1-VC-SMT3* | | This study | |
| HY1122 | *MAT*α *his3∆1 leu2∆0 lys2∆0 ura3∆0,* p413TEF | | This study | |
| HY1123 | *MAT*α *his3∆1 leu2∆0 lys2∆0 ura3∆0,* p413TEF-VC-SMT3(WT) | | This study | |
| HY1124 | *MAT*α *his3∆1 leu2∆0 lys2∆0 ura3∆0,* p413TEF-VC-SMT3(∆GG) | | This study | |
| HY1125 | *MAT*α *his3∆1 leu2∆0 lys2∆0 ura3∆0,* p413TEF-VC | | This study | |
| HY1129 | *MAT*α *his3∆1 leu2∆0 lys2∆0 ura3∆0 His3MX6*::*PRPL7B-VC-SMT3,* p415GAL | | This study | |
| HY1130 | *MAT*α *his3∆1 leu2∆0 lys2∆0 ura3∆0 His3MX6*::*PRPL7B-VC-SMT3,* p415GAL-Ulp1 | | This study | |
| HY1131 | *MAT*α *his3∆1 leu2∆0 lys2∆0 ura3∆0 His3MX6*::*PRPL7B-VC-SMT3,* p415GAL-Ulp2 | | This study | |
| HY1449 | *MAT***a** *his3∆1 leu2∆0 met15∆0 ura3∆0 His3MX6*::*PRPL7B-VN-AOS1* | | This study | |
| HY1450 | *MAT***a** *his3∆1 leu2∆0 met15∆0 ura3∆0 His3MX6*::*PRPL7B-VN-RSC58* | | This study | |
| HY1451 | *MAT***a** *his3∆1 leu2∆0 met15∆0 ura3∆0 His3MX6*::*PRPL7B-VN-CDC3* | | This study | |
| HY1452 | *MAT***a** *his3∆1 leu2∆0 met15∆0 ura3∆0 His3MX6*::*PRPL7B-VN-UBC9* | | This study | |
| HY1453 | *MAT***a** *his3∆1 leu2∆0 met15∆0 ura3∆0 His3MX6*::*PRPL7B-VN-HSP82* | | This study | |
| HY1454 | *MAT***a** *his3∆1 leu2∆0 met15∆0 ura3∆0 His3MX6*::*PRPL7B-VN-RAP1* | | This study | |
| HY1455 | *MAT***a** *his3∆1 leu2∆0 met15∆0 ura3∆0 His3MX6*::*PRPL7B-VN-TOP1* | | This study | |
| HY1456 | *MAT***a** *his3∆1 leu2∆0 met15∆0 ura3∆0 His3MX6*::*PRPL7B-VN-POL30* | | This study | |
| HY1457 | *MAT***a***/*α *his3∆1/his3∆1 leu2∆0/leu2∆0 met15∆0/MET15 LYS2/lys2∆0 ura3∆0/ura3∆0 His3MX6*::*PRPL7B-VN-AOS1 His3MX6*::*PRPL7B-VC-SMT3* | | This study | |
| HY1458 | *MAT***a***/*α *his3∆1/his3∆1 leu2∆0/leu2∆0 met15∆0/MET15 LYS2/lys2∆0 ura3∆0/ura3∆0 His3MX6*::*PRPL7B-VN-RSC58 His3MX6*::*PRPL7B-VC-SMT3* | | This study | |
| HY1459 | *MAT***a***/*α *his3∆1/his3∆1 leu2∆0/leu2∆0 met15∆0/MET15 LYS2/lys2∆0 ura3∆0/ura3∆0 His3MX6*::*PRPL7B-VN-CDC3 His3MX6*::*PRPL7B-VC-SMT3* | | This study | |
| HY1460 | *MAT***a***/*α *his3∆1/his3∆1 leu2∆0/leu2∆0 met15∆0/MET15 LYS2/lys2∆0 ura3∆0/ura3∆0 His3MX6*::*PRPL7B-VN-UBC9 His3MX6*::*PRPL7B-VC-SMT3* | | This study | |
| HY1461 | *MAT***a***/*α *his3∆1/his3∆1 leu2∆0/leu2∆0 met15∆0/MET15 LYS2/lys2∆0 ura3∆0/ura3∆0 His3MX6*::*PRPL7B-VN-HSP82 His3MX6*::*PRPL7B-VC-SMT3* | | This study | |
| HY1462 | *MAT***a***/*α *his3∆1/his3∆1 leu2∆0/leu2∆0 met15∆0/MET15 LYS2/lys2∆0 ura3∆0/ura3∆0 His3MX6*::*PRPL7B-VN-RAP1 His3MX6*::*PRPL7B-VC-SMT3* | | This study | |
| HY1463 | *MAT***a***/*α *his3∆1/his3∆1 leu2∆0/leu2∆0 met15∆0/MET15 LYS2/lys2∆0 ura3∆0/ura3∆0 His3MX6*::*PRPL7B-VN-TOP1 His3MX6*::*PRPL7B-VC-SMT3* | | This study | |
| HY1464 | *MAT***a***/*α *his3∆1/his3∆1 leu2∆0/leu2∆0 met15∆0/MET15 LYS2/lys2∆0 ura3∆0/ura3∆0 His3MX6*::*PRPL7B-VN-POL30 His3MX6*::*PRPL7B-VC-SMT3* | | This study | |
| MK0074 | *MAT***a** *his3∆1 leu2∆0 met15∆0 ura3∆0 RPL19A-TAP*::*His3MX6* | | ([Ghaemmaghami et al. 2003](#_ENREF_1)) | |
| MK0075 | *MAT***a** *his3∆1 leu2∆0 met15∆0 ura3∆0 RPL19A-VN*::*KlURA3* | | This study | |
| MK0076 | *MAT***a** *his3∆1 leu2∆0 met15∆0 ura3∆0 RPS4B-TAP*::*His3MX6* | | ([Ghaemmaghami et al. 2003](#_ENREF_1)) | |
| MK0077 | *MAT***a** *his3∆1 leu2∆0 met15∆0 ura3∆0 RPS4B-VN*::*KlURA3* | | This study | |
| MK0078 | *MAT***a** *his3∆1 leu2∆0 met15∆0 ura3∆0 RHR2-TAP*::*His3MX6* | | ([Ghaemmaghami et al. 2003](#_ENREF_1)) | |
| MK0079 | *MAT***a** *his3∆1 leu2∆0 met15∆0 ura3∆0 RHR2-VN*::*KlURA3* | | This study | |
| MK0080 | *MAT***a** *his3∆1 leu2∆0 met15∆0 ura3∆0 BMH1-TAP*::*His3MX6* | | ([Ghaemmaghami et al. 2003](#_ENREF_1)) | |
| MK0081 | *MAT***a** *his3∆1 leu2∆0 met15∆0 ura3∆0 BMH1-VN*::*KlURA3* | | This study | |
| MK0082 | *MAT***a** *his3∆1 leu2∆0 met15∆0 ura3∆0 GPM1-TAP*::*His3MX6* | | ([Ghaemmaghami et al. 2003](#_ENREF_1)) | |
| MK0083 | *MAT***a** *his3∆1 leu2∆0 met15∆0 ura3∆0 GPM1-VN*::*KlURA3* | | This study | |
| MK0084 | *MAT***a** *his3∆1 leu2∆0 met15∆0 ura3∆0 TPI1-TAP*::*His3MX6* | | ([Ghaemmaghami et al. 2003](#_ENREF_1)) | |
| MK0085 | *MAT***a** *his3∆1 leu2∆0 met15∆0 ura3∆0 TPI1-VN*::*KlURA3* | | This study | |
| MK0161 | *MAT***a***/*α *his3∆1/his3∆1 leu2∆0/leu2∆0 met15∆0/MET15 LYS2/lys2∆0 ura3∆0/ura3∆0 TAL1-VN*::*KlURA3, His3MX6*::*PRPL7B-VC-SMT3* | | This study | |
| MK0162 | *MAT***a***/*α *his3∆1/his3∆1 leu2∆0/leu2∆0 met15∆0/MET15 LYS2/lys2∆0 ura3∆0/ura3∆0 TAL1-GFP*::*His3MX6* | | This study | |
| MK0163 | *MAT***a***/*α *his3∆1/his3∆1 leu2∆0/leu2∆0 met15∆0/MET15 LYS2/lys2∆0 ura3∆0/ura3∆0 TDH3-VN*::*KlURA3, His3MX6*::*PRPL7B-VC-SMT3* | | This study | |
| MK0164 | *MAT***a***/*α *his3∆1/his3∆1 leu2∆0/leu2∆0 met15∆0/MET15 LYS2/lys2∆0 ura3∆0/ura3∆0 TDH3-GFP*::*His3MX6* | | This study | |
| MK0165 | *MAT***a***/*α *his3∆1/his3∆1 leu2∆0/leu2∆0 met15∆0/MET15 LYS2/lys2∆0 ura3∆0/ura3∆0 APA1-VN*::*KlURA3, His3MX6*::*PRPL7B-VC-SMT3* | | This study | |
| MK0166 | *MAT***a***/*α *his3∆1/his3∆1 leu2∆0/leu2∆0 met15∆0/MET15 LYS2/lys2∆0 ura3∆0/ura3∆0 APA1-GFP*::*His3MX6* | | This study | |
| MK0167 | *MAT***a***/*α *his3∆1/his3∆1 leu2∆0/leu2∆0 met15∆0/MET15 LYS2/lys2∆0 ura3∆0/ura3∆0 URA1-VN*::*KlURA3, His3MX6*::*PRPL7B-VC-SMT3* | | This study | |
| MK0168 | *MAT***a***/*α *his3∆1/his3∆1 leu2∆0/leu2∆0 met15∆0/MET15 LYS2/lys2∆0 ura3∆0/ura3∆0 URA1-GFP*::*His3MX6* | | This study | |
| MK0169 | *MAT***a***/*α *his3∆1/his3∆1 leu2∆0/leu2∆0 met15∆0/MET15 LYS2/lys2∆0 ura3∆0/ura3∆0 IBI2-VN*::*KlURA3, His3MX6*::*PRPL7B-VC-SMT3* | | This study | |
| MK0170 | *MAT***a***/*α *his3∆1/his3∆1 leu2∆0/leu2∆0 met15∆0/MET15 LYS2/lys2∆0 ura3∆0/ura3∆0 IBI2-GFP*::*His3MX6* | | This study | |
| MK0171 | *MAT***a***/*α *his3∆1/his3∆1 leu2∆0/leu2∆0 met15∆0/MET15 LYS2/lys2∆0 ura3∆0/ura3∆0 YHB1-VN*::*KlURA3, His3MX6*::*PRPL7B-VC-SMT3* | | This study | |
| MK0172 | *MAT***a***/*α *his3∆1/his3∆1 leu2∆0/leu2∆0 met15∆0/MET15 LYS2/lys2∆0 ura3∆0/ura3∆0 YHB1-GFP*::*His3MX6* | | This study | |
| MK0173 | *MAT***a** *his3∆1 leu2∆0 met15∆0 ura3∆0 SER2-GFP*::*His3MX6,* p415GAL | | This study | |
| MK0174 | *MAT***a** *his3∆1 leu2∆0 met15∆0 ura3∆0 SER2-GFP*::*His3MX6,* p415GAL-Ulp1 | | This study | |
| MK0175 | *MAT***a** *his3∆1 leu2∆0 met15∆0 ura3∆0 SER2-GFP*::*His3MX6,* p415GAL-Ulp2 | | This study | |
| MK0176 | *MAT***a** *his3∆1 leu2∆0 met15∆0 ura3∆0 BMH1-GFP*::*His3MX6,* p415GAL | | This study | |
| MK0177 | *MAT***a** *his3∆1 leu2∆0 met15∆0 ura3∆0 BMH1-GFP*::*His3MX6,* p415GAL-Ulp1 | | This study | |
| MK0178 | *MAT***a** *his3∆1 leu2∆0 met15∆0 ura3∆0 BMH1-GFP*::*His3MX6,* p415GAL-Ulp2 | | This study | |
| MK0179 | *MAT***a** *his3∆1 leu2∆0 met15∆0 ura3∆0 ALD6-GFP*::*His3MX6,* p415GAL | | This study | |
| MK0180 | *MAT***a** *his3∆1 leu2∆0 met15∆0 ura3∆0 TIF11-GFP*::*His3MX6* | | ([Huh et al. 2003](#_ENREF_2)) | |
| MK0180 | *MAT***a** *his3∆1 leu2∆0 met15∆0 ura3∆0 ALD6-GFP*::*His3MX6,* p415GAL-Ulp1 | | This study | |
| MK0181 | *MAT***a** *his3∆1 leu2∆0 met15∆0 ura3∆0 TSA1-GFP*::*His3MX6* | | ([Huh et al. 2003](#_ENREF_2)) | |
| MK0181 | *MAT***a** *his3∆1 leu2∆0 met15∆0 ura3∆0 ALD6-GFP*::*His3MX6,* p415GAL-Ulp2 | | This study | |
| MK0182 | *MAT***a** *his3∆1 leu2∆0 met15∆0 ura3∆0 YKR043C-GFP*::*His3MX6* | | ([Huh et al. 2003](#_ENREF_2)) | |
| MK0182 | *MAT***a** *his3∆1 leu2∆0 met15∆0 ura3∆0 ADO1-GFP*::*His3MX6,* p415GAL | | This study | |
| MK0183 | *MAT***a** *his3∆1 leu2∆0 met15∆0 ura3∆0 YPL225W-GFP*::*His3MX6* | | ([Huh et al. 2003](#_ENREF_2)) | |
| MK0183 | *MAT***a** *his3∆1 leu2∆0 met15∆0 ura3∆0 ADO1-GFP*::*His3MX6,* p415GAL-Ulp1 | | This study | |
| MK0184 | *MAT***a** *his3∆1 leu2∆0 met15∆0 ura3∆0 YPR1-GFP*::*His3MX6* | | ([Huh et al. 2003](#_ENREF_2)) | |
| MK0184 | *MAT***a** *his3∆1 leu2∆0 met15∆0 ura3∆0 ADO1-GFP*::*His3MX6,* p415GAL-Ulp2 | | This study | |
| MK0185 | *MAT***a** *his3∆1 leu2∆0 met15∆0 ura3∆0 CWP2-GFP*::*His3MX6* | | ([Huh et al. 2003](#_ENREF_2)) | |
| MK0185 | *MAT***a** *his3∆1 leu2∆0 met15∆0 ura3∆0 YER067W-GFP*::*His3MX6,* p415GAL | | This study | |
| MK0186 | *MAT***a** *his3∆1 leu2∆0 met15∆0 ura3∆0 RCL1-GFP*::*His3MX6* | | ([Huh et al. 2003](#_ENREF_2)) | |
| MK0186 | *MAT***a** *his3∆1 leu2∆0 met15∆0 ura3∆0 YER067W-GFP*::*His3MX6,* p415GAL-Ulp1 | | This study | |
| MK0187 | *MAT***a** *his3∆1 leu2∆0 met15∆0 ura3∆0 THR1-GFP*::*His3MX6* | | ([Huh et al. 2003](#_ENREF_2)) | |
| MK0187 | *MAT***a** *his3∆1 leu2∆0 met15∆0 ura3∆0 YER067W-GFP*::*His3MX6,* p415GAL-Ulp2 | | This study | |
| MK0188 | *MAT***a** *his3∆1 leu2∆0 met15∆0 ura3∆0 TMA22-GFP*::*His3MX6* | | ([Huh et al. 2003](#_ENREF_2)) | |
| MK0188 | *MAT***a** *his3∆1 leu2∆0 met15∆0 ura3∆0 SAM2-GFP*::*His3MX6,* p415GAL | | This study | |
| MK0189 | *MAT***a** *his3∆1 leu2∆0 met15∆0 ura3∆0 VMA4-GFP*::*His3MX6* | | ([Huh et al. 2003](#_ENREF_2)) | |
| MK0189 | *MAT***a** *his3∆1 leu2∆0 met15∆0 ura3∆0 SAM2-GFP*::*His3MX6,* p415GAL-Ulp1 | | This study | |
| MK0190 | *MAT***a** *his3∆1 leu2∆0 met15∆0 ura3∆0 HIS7-GFP*::*His3MX6* | | ([Huh et al. 2003](#_ENREF_2)) | |
| MK0190 | *MAT***a** *his3∆1 leu2∆0 met15∆0 ura3∆0 SAM2-GFP*::*His3MX6,* p415GAL-Ulp2 | | This study | |
| MK0191 | *MAT***a** *his3∆1 leu2∆0 met15∆0 ura3∆0 RPL1B-GFP*::*His3MX6* | | ([Huh et al. 2003](#_ENREF_2)) | |
| MK0191 | *MAT***a** *his3∆1 leu2∆0 met15∆0 ura3∆0 SHM2-GFP*::*His3MX6,* p415GAL | | This study | |
| MK0192 | *MAT***a** *his3∆1 leu2∆0 met15∆0 ura3∆0 SHM2-GFP*::*His3MX6,* p415GAL-Ulp1 | | This study | |
| MK0193 | *MAT***a** *his3∆1 leu2∆0 met15∆0 ura3∆0 SHM2-GFP*::*His3MX6,* p415GAL-Ulp2 | | This study | |

**SUPPLEMENTAL REFERENCES**

Ghaemmaghami S, Huh W, Bower K, Howson RW, Belle A, Dephoure N, O'Shea EK, Weissman JS. 2003. Global analysis of protein expression in yeast. *Nature* **425:** 737-741.

Huh WK, Falvo JV, Gerke LC, Carroll AS, Howson RW, Weissman JS, O'Shea EK. 2003. Global analysis of protein localization in budding yeast. *Nature* **425:** 686-691.

Maere S, Heymans K, Kuiper M. 2005. Bingo: A cytoscape plugin to assess overrepresentation of gene ontology categories in biological networks. *Bioinformatics* **21:** 3448-3449.

Sung MK, Huh WK. 2010. In vivo quantification of protein-protein interactions in saccharomyces cerevisiae using bimolecular fluorescence complementation assay. *J Microbiol Methods* **83:** 194-201.
