# Supplementary material for: Genome-wide bimolecular fluorescence complementation analysis of SUMO interactome in yeast
Source: HighWire-hosted journal article supplement (doi:10.1101/gr.148346.112), 2013-02-12
Supplement: Table_S2.xlsx [file Table_S2.xlsx]

## Sheet: BiFC_Total 408_analysis
Table S2. SUMO interactome identified by a genome-wide BiFC assay.
Number	ORF	Gene	FVC-Smt3	FVC	FVC-Smt3/FVC	FVC-Smt3DGG	FVC-Smt3/FVC-Smt3DGG	Interaction type
1	YLR347C	KAP95	103.997	22.7	4.58136	33.5822	3.09678	Covalent modification
2	YKL182W	FAS1	41.5333	12.7167	3.26606	22.7378	1.82662	Covalent modification
3	YOR341W	RPA190	32.3056	15.6333	2.06645	28.2267	1.1445	Covalent modification
4	YMR229C	RRP5	87.5	23.1417	3.78106	125.114	0.699362	Non-covalent interaction
5	YPL231W	FAS2	17.3056	14.4083	1.20108	23.4296	0.738618	Non-covalent interaction
6	YJL109C	UTP10	81.6519	104.6	0.78061	66.1524	1.2343	False-positive candidate
7	YJL197W	UBP12	59.6815	19.75	3.02185	22.2	2.68836	Covalent modification
8	YOR116C	RPO31	44.6	24.7944	1.79879	43.1319	1.03404	Covalent modification
9	YBR115C	LYS2	16.8667	26.4762	0.63705	16.1422	1.04488	False-positive candidate
10	YDR217C	RAD9	61.2481	30.8944	1.9825	49.7333	1.23153	Covalent modification
11	YPL226W	NEW1	14.2222	12.3583	1.15082	12.0356	1.18168	Covalent modification
12	YJL076W	NET1	42.4519	24.7889	1.71254	30.0859	1.41102	Covalent modification
13	YPR010C	RPA135	122.767	91.1528	1.34682	122.507	1.00212	Covalent modification
14	YJL050W	MTR4	46.2333	24.1468	1.91468	45.0311	1.0267	Covalent modification
15	YDR060W	MAK21	53.8037	32.7667	1.64203	60.3378	0.891708	Non-covalent interaction
16	YML010W	SPT5	36.5556	28.0333	1.304	71.5606	0.510833	Non-covalent interaction
17	YKL210W	UBA1	101.489	53.1806	1.90838	70.9689	1.43005	Covalent modification
18	YOL145C	CTR9	38.5926	25.1	1.53755	49.12	0.78568	Non-covalent interaction
19	YBL076C	ILS1	18.4259	17.2183	1.07014	19.1793	0.960721	Non-covalent interaction
20	YLR249W	YEF3	131.744	78.3542	1.6814	126.252	1.04351	Covalent modification
21	YGR240C	PFK1	32.6	19.8667	1.64094	38.7651	0.840963	Non-covalent interaction
22	YGL207W	SPT16	73.3778	24.9444	2.94165	65.4696	1.12079	Covalent modification
23	YBR112C	CYC8	42.6889	38.7333	1.10212	45.9822	0.928378	Non-covalent interaction
24	YMR205C	PFK2	31.4296	23.5222	1.33617	32.1244	0.978371	Non-covalent interaction
25	YGR162W	TIF4631	16.2889	12.9667	1.25621	15.6978	1.03766	Covalent modification
26	YOR335C	ALA1	14.5704	17.4	0.837378	16.2459	0.896863	False-positive candidate
27	YCR057C	PWP2	62.6222	87.7	0.71405	55.9437	1.11938	False-positive candidate
28	YER070W	RNR1	87.4667	27.7778	3.1488	126.76	0.690018	Non-covalent interaction
29	YLR045C	STU2	36.9111	21.3	1.73292	32.0222	1.15267	Covalent modification
30	YOR168W	GLN4	10.437	17.8556	0.584526	9.00444	1.1591	False-positive candidate
31	YOR195W	SLK19	72.4444	14.5444	4.9809	21.1333	3.42797	Covalent modification
32	YMR309C	NIP1	26	16.4667	1.57895	13.4222	1.93709	Covalent modification
33	YOR133W	EFT1	21.3556	20.3667	1.04855	29.8281	0.715953	Non-covalent interaction
34	YLR222C	UTP13	51.4667	90.85	0.566502	80.0178	0.64319	False-positive candidate
35	YOR361C	PRT1	13.5778	13.5694	1.00061	12.2444	1.10889	Covalent modification
36	YER091C	MET6	59.7333	31.4	1.90234	56.3378	1.06027	Covalent modification
37	YDR324C	UTP4	73.1389	51.8036	1.41185	63.84	1.14566	Covalent modification
38	YJL033W	HCA4	34.3333	31.1833	1.10102	49.7067	0.690719	Non-covalent interaction
39	YGL120C	PRP43	52.8	81.6667	0.646531	65.7067	0.803571	False-positive candidate
40	YGL009C	LEU1	79.5667	16.7333	4.75498	29.2267	2.7224	Covalent modification
41	YOR206W	NOC2	61.7037	45.1667	1.36613	97.7215	0.631424	Non-covalent interaction
42	YGR128C	UTP8	59.3667	64.8333	0.915681	59.6978	0.994454	False-positive candidate
43	YMR186W	HSC82	136.852	44.4611	3.07801	92.9244	1.47272	Covalent modification
44	YIL144W	TID3	19.8481	17.2556	1.15025	26.6963	0.743479	Non-covalent interaction
45	YPR074C	TKL1	197.2	43.5056	4.53275	144.64	1.36338	Covalent modification
46	YLR153C	ACS2	98.7259	50.1222	1.9697	67.5733	1.46102	Covalent modification
47	YBR121C	GRS1	29.9185	22.5722	1.32546	19.443	1.53878	Covalent modification
48	YLR002C	NOC3	25.6556	20.45	1.25455	37.7185	0.680185	Non-covalent interaction
49	YAL005C	SSA1	97.9333	71.0333	1.3787	52	1.88333	Covalent modification
50	YLL024C	SSA2	130.867	64.7444	2.02128	110.492	1.1844	Covalent modification
51	YAL016W	TPD3	38.5556	25.6222	1.50477	18.1333	2.12623	Covalent modification
52	YDR398W	UTP5	49.3889	41.3333	1.19489	46.2815	1.06714	Covalent modification
53	YDR390C	UBA2	29.0148	21.175	1.37024	22.5803	1.28496	Covalent modification
54	YGR103W	NOP7	26.8556	6.75	3.9786	18.9867	1.41444	Covalent modification
55	YNL209W	SSB2	139.422	38.5139	3.62005	64.2267	2.17078	Covalent modification
56	YDR341C		12.4722	13.9944	0.891227	15.8044	0.789159	False-positive candidate
57	YGL125W	MET13	33.1111	30.3	1.09278	29.4815	1.12312	Covalent modification
58	YDR101C	ARX1	55.6889	74.1944	0.75058	78.1733	0.712377	False-positive candidate
59	YDL063C		28.9444	19.3278	1.49756	26.8444	1.07823	Covalent modification
60	YJL069C	UTP18	50.3667	57.7917	0.871521	51.437	0.979191	False-positive candidate
61	YER036C	ARB1	18.6852	29.7361	0.628367	20.2341	0.923451	False-positive candidate
62	YDL229W	SSB1	70.663	34.5972	2.04245	106.764	0.661859	Non-covalent interaction
63	YBL039C	URA7	24.6296	11.9556	2.0601	14.8948	1.65357	Covalent modification
64	YJL105W	SET4	21.0833	33.2056	0.634934	17.7393	1.18851	False-positive candidate
65	YGR124W	ASN2	18.5815	15.1583	1.22583	17.5822	1.05683	Covalent modification
66	YDR120C	TRM1	24.3426	18.6111	1.30796	29.6178	0.821891	Non-covalent interaction
67	YFR028C	CDC14	29.0926	15.9	1.82972	28.3111	1.0276	Covalent modification
68	YNL189W	SRP1	72.7889	32.2	2.26052	56.4978	1.28835	Covalent modification
69	YPL212C	PUS1	44.5333	29.3	1.51991	40.2667	1.10596	Covalent modification
70	YBR248C	HIS7	7.02222	18.8222	0.373081	12.7704	0.549884	False-positive candidate
71	YPR144C	NOC4	30.2037	22.8583	1.32134	53.4519	0.565064	Non-covalent interaction
72	YDR299W	BFR2	40.2944	39.8472	1.01122	60.8504	0.662189	Non-covalent interaction
73	YDL225W	SHS1	53.6667	41.6556	1.28834	52.0815	1.03044	Covalent modification
74	YGL078C	DBP3	88.7889	52.3333	1.6966	125.671	0.706518	Non-covalent interaction
75	YER025W	GCD11	17.5222	13.5917	1.28919	15.2207	1.15121	Covalent modification
76	YGL122C	NAB2	48.2778	15.9444	3.02787	27.5022	1.75541	Covalent modification
77	YKL081W	TEF4	35.5111	33.7583	1.05192	71.6267	0.495781	Non-covalent interaction
78	YEL071W	DLD3	12.4148	14.2917	0.868675	11.36	1.09285	False-positive candidate
79	YOR310C	NOP58	64.2	20.4	3.14706	120.267	0.533814	Non-covalent interaction
80	YGR155W	CYS4	20.4111	18.975	1.07568	27.8044	0.734095	Non-covalent interaction
81	YPL061W	ALD6	144.306	34.1333	4.2277	47.4311	3.04242	Covalent modification
82	YAL038W	CDC19	98.1778	48.7	2.01597	112.587	0.87202	Non-covalent interaction
83	YLR197W	SIK1	100.322	98.2222	1.02138	123.831	0.810154	Non-covalent interaction
84	YCR052W	RSC6	35.9778	23.675	1.51965	33.9037	1.06118	Covalent modification
85	YLR175W	CBF5	137.796	64.625	2.13224	159.419	0.864364	Non-covalent interaction
86	YHR183W	GND1	79	19.2889	4.09562	41.5644	1.90066	Covalent modification
87	YFR053C	HXK1	16.5556	17.5	0.946032	19.3778	0.854358	False-positive candidate
88	YLL011W	SOF1	47.4111	14.1333	3.35456	39.84	1.19004	Covalent modification
89	YER133W	GLC7	45.3481	15.4333	2.93832	20.1067	2.25538	Covalent modification
90	YML126C	ERG13	48.1556	11.6389	4.13747	32.3822	1.4871	Covalent modification
91	YGL097W	SRM1	18.4815	7.83333	2.35934	17.4756	1.05756	Covalent modification
92	YCL037C	SRO9	27.9111	18.4389	1.51371	16.0593	1.73801	Covalent modification
93	YDR190C	RVB1	60.0444	20.5333	2.92424	80.0889	0.749723	Non-covalent interaction
94	YOR198C	BFR1	21.7206	11.2333	1.93359	13.4978	1.6092	Covalent modification
95	YLR058C	SHM2	37.163	21.2667	1.74747	25.4133	1.46234	Covalent modification
96	YEL040W	UTR2	36.6481	13.8333	2.64926	13.1911	2.77825	Covalent modification
97	YHR066W	SSF1	20.4944	13.95	1.46914	19.3467	1.05933	Covalent modification
98	YGR254W	ENO1	35.8	21.3	1.68075	26.0178	1.37598	Covalent modification
99	YPR163C	TIF3	26.5296	21.7778	1.2182	20.5689	1.28979	Covalent modification
100	YNR050C	LYS9	17.3222	19.7	0.879301	17.5467	0.987209	False-positive candidate
101	YHR174W	ENO2	145.298	104.204	1.39436	126.009	1.15308	Covalent modification
102	YDR165W	TRM82	39.9056	29.1333	1.36976	35.4933	1.12431	Covalent modification
103	YDL131W	LYS21	175.885	32.4083	5.42716	67.5437	2.60402	Covalent modification
104	YPL145C	KES1	24.7185	9.51667	2.59739	9.83704	2.5128	Covalent modification
105	YDL147W	RPN5	30.1	11.875	2.53474	10.8741	2.76805	Covalent modification
106	YOR230W	WTM1	81.7667	27.1583	3.01074	62.5481	1.30726	Covalent modification
107	YGR285C	ZUO1	19.8444	34.1667	0.580813	18.7378	1.05906	False-positive candidate
108	YLR027C	AAT2	68.3778	29.9	2.28688	53.4519	1.27924	Covalent modification
109	YIR012W	SQT1	57.4222	29.3167	1.95869	26.4607	2.17009	Covalent modification
110	YDL182W	LYS20	115.783	21.6667	5.34385	86.8385	1.33332	Covalent modification
111	YDL150W	RPC53	37.2667	20.6667	1.80323	38.88	0.958505	Non-covalent interaction
112	YOR209C	NPT1	47.2444	26.8167	1.76176	22.0444	2.14315	Covalent modification
113	YOR051C		72.1278	21.4444	3.36347	46.4474	1.55289	Covalent modification
114	YDR432W	NPL3	215.274	98.0417	2.19574	114.018	1.88807	Covalent modification
115	YMR235C	RNA1	27.1333	25.2417	1.07494	30.6444	0.885424	Non-covalent interaction
116	YGR159C	NSR1	172.472	33.7667	5.10777	129.609	1.33071	Covalent modification
117	YJR076C	CDC11	48.2444	19.7556	2.44207	34.9689	1.37964	Covalent modification
118	YPR133C	SPN1	36.1759	18.1667	1.99134	31.6267	1.14384	Covalent modification
119	YCR012W	PGK1	156	96.1556	1.62237	140.729	1.10851	Covalent modification
120	YML074C	FPR3	93.0722	33.4333	2.78382	52.1778	1.78375	Covalent modification
121	YKR092C	SRP40	79.8056	30.5889	2.60897	127.662	0.625131	Non-covalent interaction
122	YPR041W	TIF5	33.5407	26.3333	1.2737	27.8044	1.20631	Covalent modification
123	YAL012W	CYS3	63.7333	39.3667	1.61897	43.0993	1.47876	Covalent modification
124	YGR234W	YHB1	81.1778	25.6722	3.16209	36.7378	2.20965	Covalent modification
125	YPL028W	ERG10	123.33	43.4222	2.84024	97.4222	1.26593	Covalent modification
126	YKR059W	TIF1	53.15	32.8778	1.61659	66.6874	0.797002	Non-covalent interaction
127	YBR025C	OLA1	41.8889	32.8222	1.27624	37.7867	1.10856	Covalent modification
128	YLR226W	BUR2	27.5389	22.4917	1.2244	20.92	1.31639	Covalent modification
129	YLR244C	MAP1	54.8444	35.2	1.55808	51.3422	1.06821	Covalent modification
130	YHR179W	OYE2	46.3333	32.9167	1.40759	47.7185	0.970972	Non-covalent interaction
131	YLR449W	FPR4	111.122	20.1917	5.50337	101.373	1.09617	Covalent modification
132	YDR161W		49.85	26.7333	1.86471	37.7778	1.31956	Covalent modification
133	YGR187C	HGH1	32.6611	25.8417	1.26389	26.2222	1.24555	Covalent modification
134	YEL046C	GLY1	106.433	23.55	4.51946	51.203	2.07866	Covalent modification
135	YLR418C	CDC73	38.6778	22.3667	1.72926	37.8489	1.0219	Covalent modification
136	YHR052W	CIC1	50.65	17.2667	2.9334	45.1733	1.12124	Covalent modification
137	YLR180W	SAM1	91.837	30.1333	3.04769	51.7911	1.77322	Covalent modification
138	YLR291C	GCD7	8.65	23.5278	0.367651	15.6267	0.553541	False-positive candidate
139	YDR502C	SAM2	91.3722	49.119	1.86022	70.0622	1.30416	Covalent modification
140	YGL105W	ARC1	19.7889	15.8333	1.24982	16.0593	1.23224	Covalent modification
141	YNL134C		19.3833	9.20833	2.10498	13.3911	1.44748	Covalent modification
142	YBR249C	ARO4	64.6222	19.6667	3.28588	42.5244	1.51965	Covalent modification
143	YDR035W	ARO3	63.1704	23.8	2.65422	51.4311	1.22825	Covalent modification
144	YPR035W	GLN1	140.311	23.5333	5.96223	43.3067	3.23994	Covalent modification
145	YCR095C	OCA4	76.1926	22.6917	3.35773	46.6667	1.6327	Covalent modification
146	YPL081W	RPS9A	30.0222	36.5083	0.822339	33.8133	0.887881	False-positive candidate
147	YLR048W	RPS0B	53.9111	35.5	1.51862	35.7333	1.50871	Covalent modification
148	YOL010W	RCL1	50.4519	26.6389	1.89392	63.3289	0.796664	Non-covalent interaction
149	YPL090C	RPS6A	83.5333	50.5	1.65413	95.3244	0.876305	Non-covalent interaction
150	YLR216C	CPR6	30.563	19.9583	1.53134	28.3526	1.07796	Covalent modification
151	YDR158W	HOM2	30.8222	32	0.963194	36.3378	0.848214	False-positive candidate
152	YJR139C	HOM6	57.0889	65.4	0.872919	65.6178	0.870022	False-positive candidate
153	YER127W	LCP5	36.1333	127.6	0.283177	30.1541	1.19829	False-positive candidate
154	YDR214W	AHA1	33.963	24.4333	1.39003	20.8889	1.62589	Covalent modification
155	YKL060C	FBA1	134.094	64.5889	2.07612	133.24	1.00641	Covalent modification
156	YHR025W	THR1	74.0889	33.9	2.18551	125.453	0.590569	Non-covalent interaction
157	YMR318C	ADH6	35.3333	21.8667	1.61585	24.4059	1.44774	Covalent modification
158	YBR181C	RPS6B	58.4889	50.4389	1.1596	44.2895	1.3206	Covalent modification
159	YNL141W	AAH1	46.8889	35.6333	1.31587	23.3778	2.0057	Covalent modification
160	YBR084C-A	RPL19A	46.3111	20.6167	2.24629	45.8015	1.01113	Covalent modification
161	YNL007C	SIS1	111.711	41.55	2.68859	43.2	2.58591	Covalent modification
162	YHR203C	RPS4B	59.3333	66.7667	0.888667	61.6	0.963203	False-positive candidate
163	YNR035C	ARC35	29.9889	25.2333	1.18846	20.2533	1.48069	Covalent modification
164	YNL290W	RFC3	34.1759	25.9167	1.31869	34.2933	0.996576	Non-covalent interaction
165	YOR061W	CKA2	38.5185	29.4417	1.3083	32	1.2037	Covalent modification
166	YOL151W	GRE2	82.1852	22.1	3.71879	32.4622	2.53172	Covalent modification
167	YGR180C	RNR4	207.793	39.5917	5.24839	108.773	1.91033	Covalent modification
168	YJR105W	ADO1	84.9481	27.7083	3.0658	33.7067	2.52022	Covalent modification
169	YDR077W	SED1	109.548	31.7778	3.44732	64.4444	1.69989	Covalent modification
170	YGR086C	PIL1	115.956	60.5	1.91662	50.3556	2.30274	Covalent modification
171	YER156C		86.137	61.7667	1.39456	92.96	0.926603	Non-covalent interaction
172	YKR081C	RPF2	43.1852	19.2667	2.24145	44.8148	0.963636	Non-covalent interaction
173	YGR192C	TDH3	182.222	161.9	1.12552	145.763	1.25013	Covalent modification
174	YOR340C	RPA43	71.2111	22.8	3.12329	48.96	1.45448	Covalent modification
175	YPR110C	RPC40	96.9556	69.7667	1.38971	93.2089	1.0402	Covalent modification
176	YHR104W	GRE3	59.037	29.5389	1.99862	24.2519	2.43433	Covalent modification
177	YHR010W	RPL27A	73.8667	50.2167	1.47096	51.7393	1.42767	Covalent modification
178	YMR142C	RPL13B	42.1556	49.9944	0.843205	42.1933	0.999105	False-positive candidate
179	YJR009C	TDH2	132.444	75.2333	1.76045	99.6775	1.32873	Covalent modification
180	YNL301C	RPL18B	38.9139	22.7833	1.708	19.4519	2.00052	Covalent modification
181	YMR143W	RPS16A	15.146	12.0833	1.25346	14.9867	1.01063	Covalent modification
182	YKR062W	TFA2	31.2889	23.4111	1.3365	34.6533	0.902911	Non-covalent interaction
183	YLR354C	TAL1	95.2519	32.4167	2.93836	66.4889	1.4326	Covalent modification
184	YPL111W	CAR1	113.157	19.5333	5.79304	32.6933	3.46118	Covalent modification
185	YBR189W	RPS9B	106.456	70.3056	1.51418	93.8993	1.13372	Covalent modification
186	YJR070C	LIA1	91.8667	34.0429	2.69856	35.3905	2.5958	Covalent modification
187	YCR002C	CDC10	42.8444	30.9	1.38655	42.36	1.01144	Covalent modification
188	YDR353W	TRR1	65.2444	23.7583	2.74617	45.1733	1.44431	Covalent modification
189	YIL021W	RPB3	47.3778	60.4333	0.783968	61.0533	0.776006	False-positive candidate
190	YNL063W	MTQ1	37.7	32.2667	1.16839	36.3881	1.03605	Covalent modification
191	YNL002C	RLP7	10.7259	18.2	0.589337	15.6119	0.687037	False-positive candidate
192	YDL124W		101.593	41.5333	2.44605	64.363	1.57843	Covalent modification
193	YNR054C	ESF2	42.1833	27.6	1.52838	42.08	1.00246	Covalent modification
194	YDL236W	PHO13	57.4389	17.9	3.20888	22.5244	2.55007	Covalent modification
195	YCL050C	APA1	63.9556	38	1.68304	31.8222	2.00978	Covalent modification
196	YDL082W	RPL13A	66.7111	31.5667	2.11334	36.4267	1.83138	Covalent modification
197	YKL216W	URA1	122.272	34.1333	3.58219	37.4311	3.26659	Covalent modification
198	YDR368W	YPR1	40.3222	9.2	4.38285	12.9985	3.10206	Covalent modification
199	YNL096C	RPS7B	37.7815	47.0667	0.802723	34.5244	1.09434	False-positive candidate
200	YAR015W	ADE1	24.1111	20.0278	1.20388	21.8667	1.10264	Covalent modification
201	YGL043W	DST1	32.8704	20.4667	1.60604	38.9867	0.843118	Non-covalent interaction
202	YLR448W	RPL6B	33.5333	29.9722	1.11881	32.6578	1.02681	Covalent modification
203	YGR208W	SER2	22.8444	20.1389	1.13434	16.5185	1.38296	Covalent modification
204	YFR031C-A	RPL2A	18.1556	11.7444	1.54588	23.2279	0.781626	Non-covalent interaction
205	YPL079W	RPL21B	22	23.3722	0.941288	24.5363	0.896631	False-positive candidate
206	YBR160W	CDC28	42.8222	27.3	1.56858	24.3911	1.75565	Covalent modification
207	YFR004W	RPN11	93.3741	44.2333	2.11094	54.1511	1.72432	Covalent modification
208	YLR367W	RPS22B	80.0185	24.4556	3.272	101.03	0.79203	Non-covalent interaction
209	YAL034W-A	MTW1	21.6667	18.0667	1.19926	14.0444	1.54272	Covalent modification
210	YMR099C		31.7852	22.6667	1.40229	23.1111	1.37532	Covalent modification
211	YIL133C	RPL16A	31.838	30.7037	1.03694	25.7981	1.23412	Covalent modification
212	YOL077C	BRX1	43.1704	61.2111	0.70527	82.563	0.522878	False-positive candidate
213	YKL128C	PMU1	9.36111	12.8667	0.727547	8.56889	1.09245	False-positive candidate
214	YKL052C	ASK1	40.5056	18.2222	2.22287	36.7852	1.10114	Covalent modification
215	YKR037C	SPC34	54.5722	20.6	2.64914	50.2444	1.08613	Covalent modification
216	YHL034C	SBP1	19.2259	13.3222	1.44315	15.0252	1.27958	Covalent modification
217	YJL177W	RPL17B	32.2593	20.1	1.60494	19.563	1.649	Covalent modification
218	YDR098C	GRX3	65.5926	15.4	4.25926	20.3881	3.21719	Covalent modification
219	YNL162W	RPL42A	39.0148	15.675	2.48898	57.9378	0.673392	Non-covalent interaction
220	YPL117C	IDI1	59.6852	23.7222	2.516	23.9689	2.49011	Covalent modification
221	YOR234C	RPL33B	31.7667	30.0381	1.05755	29.8459	1.06436	Covalent modification
222	YHR163W	SOL3	18.5778	16.4722	1.12782	15.4356	1.20357	Covalent modification
223	YIL052C	RPL34B	37.3333	86.3611	0.432293	42.1587	0.885542	False-positive candidate
224	YDL186W		32.3981	40.75	0.795047	27.0296	1.19862	False-positive candidate
225	YBR011C	IPP1	46.2926	22.3	2.0759	21.3867	2.16455	Covalent modification
226	YDR361C	BCP1	87.7333	42.325	2.07285	70.037	1.25267	Covalent modification
227	YJL115W	ASF1	37.8222	18.8056	2.01123	32.6044	1.16003	Covalent modification
228	YLR344W	RPL26A	25.7111	26.8	0.95937	35.3926	0.726455	False-positive candidate
229	YGL019W	CKB1	47.6	38.1667	1.24716	66.6074	0.714635	Non-covalent interaction
230	YHL001W	RPL14B	54.1407	34.7444	1.55826	66.4178	0.815154	Non-covalent interaction
231	YER177W	BMH1	67.1852	32.4056	2.07326	37.5333	1.79001	Covalent modification
232	YDR099W	BMH2	78.2593	26.0333	3.00612	49.7289	1.57372	Covalent modification
233	YIL053W	RHR2	186.933	75.7639	2.46731	98.2933	1.90179	Covalent modification
234	YLR150W	STM1	69.7778	30.1444	2.31478	42.4178	1.64501	Covalent modification
235	YKR043C		61.8889	28.2667	2.18947	26.1067	2.37062	Covalent modification
236	YML024W	RPS17A	64.2667	34.3	1.87366	68.4444	0.938961	Non-covalent interaction
237	YER056C-A	RPL34A	18.4815	21.9	0.843903	16.6622	1.10918	False-positive candidate
238	YPL127C	HHO1	57.4185	40.3056	1.42458	77.4519	0.741345	Non-covalent interaction
239	YHL033C	RPL8A	117.806	72.7778	1.6187	69.1852	1.70276	Covalent modification
240	YDL136W	RPL35B	37.0444	34.3611	1.07809	20.4622	1.81038	Covalent modification
241	YMR194W	RPL36A	19.8444	34.1042	0.581877	21.3867	0.927889	False-positive candidate
242	YKR094C	RPL40B	36.4593	29.3333	1.24293	64.52	0.565085	Non-covalent interaction
243	YOL038W	PRE6	76.5595	68.5	1.11766	42.837	1.78723	Covalent modification
244	YLR061W	RPL22A	91.0889	36.2111	2.5155	98.0267	0.929226	Non-covalent interaction
245	YLR441C	RPS1A	61.1333	39.1889	1.55997	39.7304	1.53871	Covalent modification
246	YOR004W	UTP23	70.2222	30.6333	2.29235	45.1733	1.55451	Covalent modification
247	YOR293W	RPS10A	33.263	28.5333	1.16576	35.9852	0.924352	Non-covalent interaction
248	YML063W	RPS1B	50.0926	42.2	1.18703	50.6519	0.988959	Non-covalent interaction
249	YER062C	HOR2	45.287	22.0333	2.05539	31.3541	1.44437	Covalent modification
250	YDR050C	TPI1	132.8	42.95	3.09197	103.815	1.2792	Covalent modification
251	YGR034W	RPL26B	49.0185	22.3222	2.19595	55.3778	0.885166	Non-covalent interaction
252	YDR174W	HMO1	70.4259	20.6611	3.40862	122.965	0.572731	Non-covalent interaction
253	YPR143W	RRP15	37.5185	15.2095	2.46678	60.1689	0.623553	Non-covalent interaction
254	YGR195W	SKI6	36.3259	17.6667	2.05618	33.4963	1.08448	Covalent modification
255	YKL152C	GPM1	80.3307	37.3143	2.15281	64.1778	1.25169	Covalent modification
256	YHR049W	FSH1	71.8995	25.2056	2.85252	26.557	2.70736	Covalent modification
257	YLR435W	TSR2	67.4444	25.8667	2.60739	30.7733	2.19165	Covalent modification
258	YMR230W	RPS10B	43.287	32.8294	1.31855	28.4593	1.52102	Covalent modification
259	YNL010W		70.0556	32.6071	2.14847	46.621	1.50266	Covalent modification
260	YNL178W	RPS3	107.311	38.8333	2.76338	61.9911	1.73107	Covalent modification
261	YGL061C	DUO1	23.6111	15.3667	1.53651	28.4876	0.82882	Non-covalent interaction
262	YDR447C	RPS17B	63.4339	38.7222	1.63818	51.763	1.22547	Covalent modification
263	YKL096W	CWP1	48.9	11.0278	4.43426	41.0667	1.19075	Covalent modification
264	YDR533C	HSP31	44.8963	15.0556	2.98204	27.7037	1.62059	Covalent modification
265	YLR406C	RPL31B	37.1852	24.2667	1.53236	31.3956	1.18441	Covalent modification
266	YNL036W	NCE103	105.404	16.2333	6.49304	48.5259	2.17211	Covalent modification
267	YGL135W	RPL1B	56.2704	73.5667	0.764889	48.6307	1.1571	False-positive candidate
268	YER007C-A	TMA20	23.791	29.4921	0.806692	34.2519	0.69459	False-positive candidate
269	YDL213C	NOP6	64.9259	23.2798	2.78894	55.9052	1.16136	Covalent modification
270	YDR226W	ADK1	60.7238	25.8056	2.35313	25.1378	2.41564	Covalent modification
271	YDR399W	HPT1	55.3333	22.1889	2.49374	19.0756	2.90075	Covalent modification
272	YGL037C	PNC1	86.1524	23.1944	3.71435	28.4978	3.02313	Covalent modification
273	YBL057C	PTH2	28.5778	16.5	1.73199	13.727	2.08187	Covalent modification
274	YPL220W	RPL1A	41.8333	35.6944	1.17198	35.145	1.19031	Covalent modification
275	YLR221C	RSA3	59.0444	25.8333	2.28559	54.0593	1.09222	Covalent modification
276	YDR500C	RPL37B	35.6254	24.4667	1.45608	32.5689	1.09385	Covalent modification
277	YKL117W	SBA1	75.2222	26.4667	2.84215	28.237	2.66396	Covalent modification
278	YNL110C	NOP15	52.9148	22.1333	2.39073	67.1941	0.787492	Non-covalent interaction
279	YPL233W	NSL1	48.5704	28.1	1.72848	42.0652	1.15465	Covalent modification
280	YMR117C	SPC24	44.2667	23.0333	1.92185	38.1037	1.16174	Covalent modification
281	YFR001W	LOC1	40.6778	24.1429	1.68488	39.7867	1.0224	Covalent modification
282	YOL139C	CDC33	43.7016	24.0556	1.81669	25.5568	1.70998	Covalent modification
283	YIL127C		35.3	18.5833	1.89955	31.8756	1.10743	Covalent modification
284	YOR021C		68.3704	25.5	2.68119	26.5422	2.57591	Covalent modification
285	YDR487C	RIB3	66.0984	30.2278	2.18668	31.6089	2.09113	Covalent modification
286	YKL024C	URA6	67.0556	14.1667	4.73333	18.1333	3.69792	Covalent modification
287	YDL130W	RPP1B	53.4889	122.2	0.437716	145.067	0.368719	False-positive candidate
288	YHR089C	GAR1	85.4667	25.5667	3.34289	92.6133	0.922833	Non-covalent interaction
289	YPL178W	CBC2	50.0833	39.7407	1.26025	58.7302	0.85277	Non-covalent interaction
290	YLR287C-A	RPS30A	35.1481	9.16667	3.83434	38.7683	0.906622	Non-covalent interaction
291	YKL144C	RPC25	38.0265	20.75	1.8326	20.9422	1.81578	Covalent modification
292	YLR185W	RPL37A	64.1481	29.0667	2.20693	64.6519	0.992209	Non-covalent interaction
293	YKL156W	RPS27A	53.9944	37.7944	1.42863	62.367	0.865754	Non-covalent interaction
294	YMR295C	IBI2	34.3935	20.3333	1.69148	25.5259	1.3474	Covalent modification
295	YLL050C	COF1	89.9074	28.6619	3.13683	34.1333	2.63401	Covalent modification
296	YDL166C	FAP7	48.837	20	2.44185	28.7259	1.7001	Covalent modification
297	YDL125C	HNT1	75.9259	21.0278	3.61074	29.2444	2.59625	Covalent modification
298	YJR014W	TMA22	35.2037	27.8556	1.26379	36.8681	0.954854	Non-covalent interaction
299	YJR112W	NNF1	22.5333	13.3333	1.69	18.8356	1.19632	Covalent modification
300	YML028W	TSA1	214.072	34.6389	6.18011	139.855	1.53067	Covalent modification
301	YOR182C	RPS30B	67.828	30.5972	2.2168	67.4993	1.00487	Covalent modification
302	YKR057W	RPS21A	64.8698	49.5708	1.30863	80.5274	0.805562	Non-covalent interaction
303	YJR094W-A	RPL43B	94.0291	39.746	2.36575	52.2074	1.80107	Covalent modification
304	YML022W	APT1	86.6111	32.8952	2.63294	31.4844	2.75092	Covalent modification
305	YGL147C	RPL9A	50.6429	35.2444	1.4369	57.4489	0.881529	Non-covalent interaction
306	YDR454C	GUK1	40.1722	16	2.51076	18.8237	2.13413	Covalent modification
307	YJR017C	ESS1	60.8148	27.8667	2.18235	49.8044	1.22107	Covalent modification
308	YBR106W	PHO88	83.5556	24.6167	3.39427	32.9778	2.53369	Covalent modification
309	YMR242C	RPL20A	57.213	31.9444	1.79101	62.1333	0.920809	Non-covalent interaction
310	YNL067W	RPL9B	91.3624	57.6857	1.5838	81.5556	1.12025	Covalent modification
311	YPL211W	NIP7	62.9778	54.5	1.15556	102.806	0.612589	Non-covalent interaction
312	YPL249C-A	RPL36B	100.296	44.3611	2.26091	103.719	0.967005	Non-covalent interaction
313	YLR109W	AHP1	160.794	71.0278	2.26382	101.778	1.57986	Covalent modification
314	YDR404C	RPB7	63.7556	50.0833	1.27299	65.3896	0.97501	Non-covalent interaction
315	YJL122W	ALB1	50.2037	46.4333	1.0812	66.8711	0.750753	Non-covalent interaction
316	YHR193C	EGD2	58.7815	30.5556	1.92376	57.4222	1.02367	Covalent modification
317	YPR102C	RPL11A	44.2667	28.8944	1.53201	52.637	0.840979	Non-covalent interaction
318	YPL037C	EGD1	53.3704	18.9667	2.8139	32.1215	1.66152	Covalent modification
319	YBR230C		49.7148	31.4667	1.57992	75.8933	0.655062	Non-covalent interaction
320	YOR276W	CAF20	35.7143	23.8413	1.498	23.6296	1.51142	Covalent modification
321	YDR201W	SPC19	36.5667	24.5333	1.49049	30.2356	1.20939	Covalent modification
322	YIR037W	HYR1	136.422	20.6627	6.60234	29.4667	4.62971	Covalent modification
323	YDR155C	CPR1	117.533	34.5476	3.40207	57.3185	2.05053	Covalent modification
324	YER067W		89.5444	20.3095	4.40899	63.8074	1.40336	Covalent modification
325	YKL056C	TMA19	129.485	38.6944	3.34635	62.6578	2.06655	Covalent modification
326	YDR418W	RPL12B	104.949	66.1444	1.58667	108.649	0.965948	Non-covalent interaction
327	YEL054C	RPL12A	70.9286	47.2421	1.50139	78.9663	0.898213	Non-covalent interaction
328	YMR002W	MIC17	71.7963	28.5556	2.51427	44.3683	1.61819	Covalent modification
329	YGR148C	RPL24B	90.1111	46.2667	1.94765	94.9467	0.949071	Non-covalent interaction
330	YJR104C	SOD1	153.733	44.9905	3.41702	82.4889	1.86369	Covalent modification
331	YKL067W	YNK1	121.981	47.4	2.57345	39.8222	3.06315	Covalent modification
332	YDL110C	TMA17	84.5111	18.3333	4.6097	31.7037	2.66565	Covalent modification
333	YMR260C	TIF11	99.1167	16.5333	5.99496	34.6083	2.86396	Covalent modification
334	YNL255C	GIS2	105.904	25.6167	4.13417	65.3511	1.62053	Covalent modification
335	YCR087C-A	LUG1	63.5333	17.0667	3.72266	58.4296	1.08735	Covalent modification
336	YNL281W	HCH1	47.4259	36.5667	1.29697	32.48	1.46016	Covalent modification
337	YGL031C	RPL24A	92.8889	51.4	1.80718	95.8222	0.969388	Non-covalent interaction
338	YBR135W	CKS1	28.9873	18.5667	1.56126	22.7852	1.2722	Covalent modification
339	YGR074W	SMD1	47.15	19.8667	2.37332	36.5333	1.2906	Covalent modification
340	YNL113W	RPC19	88.836	46.0944	1.92726	68.2074	1.30244	Covalent modification
341	YDR156W	RPA14	123.796	59.0833	2.09528	111.396	1.11132	Covalent modification
342	YOR224C	RPB8	89.0778	27.7667	3.20808	54.9867	1.61999	Covalent modification
343	YKL160W	ELF1	37.2407	22.4333	1.66006	33.3037	1.11822	Covalent modification
344	YPL225W		58.1778	20.15	2.88723	43.181	1.3473	Covalent modification
345	YMR074C		38.7037	21.5667	1.79461	17.0341	2.27213	Covalent modification
346	YOR285W		66.9556	21.1667	3.16325	28.1778	2.37618	Covalent modification
347	YDR513W	TTR1	54.9722	23.4167	2.34757	40.1126	1.37045	Covalent modification
348	YNR046W	TRM112	39.7804	30.6111	1.29954	36.5719	1.08773	Covalent modification
349	YHR132W-A	IGO2	39.6815	22.1333	1.79284	19.6444	2.01998	Covalent modification
350	YJL190C	RPS22A	211.452	56.1944	3.76286	147.363	1.4349	Covalent modification
351	YOL012C	HTZ1	33.6593	9.45833	3.55869	36.5393	0.921181	Non-covalent interaction
352	YJR063W	RPA12	81.9907	34.5139	2.37559	79.9437	1.02561	Covalent modification
353	YOL005C	RPB11	46.0185	24.2389	1.89854	44.3733	1.03708	Covalent modification
354	YBR253W	SRB6	30.5037	39.5167	0.77192	50.0519	0.609442	False-positive candidate
355	YNL135C	FPR1	164.07	28.4	5.77713	51.6444	3.17692	Covalent modification
356	YCL035C	GRX1	42.463	14.4333	2.94201	16.3619	2.59523	Covalent modification
357	YHR087W	RTC3	62.3519	13.0611	4.77386	46.1807	1.35017	Covalent modification
358	YDR382W	RPP2B	91.6111	90.1333	1.0164	77.0667	1.18873	Covalent modification
359	YFL014W	HSP12	145.397	26.1333	5.56365	79.6333	1.82583	Covalent modification
360	YBL028C		80.95	29.0833	2.78338	54.1503	1.49491	Covalent modification
361	YOL039W	RPP2A	91.0556	48.5167	1.87679	96.643	0.942185	Non-covalent interaction
362	YGR063C	SPT4	61.3651	28.75	2.13444	62.6667	0.97923	Non-covalent interaction
363	YNL198C		50.6444	19.0333	2.66083	25.4637	1.98889	Covalent modification
364	YBR233W-A	DAD3	35.8611	30.1667	1.18877	30.9511	1.15864	Covalent modification
365	YBR089C-A	NHP6B	50.9167	22.1222	2.30161	41.2444	1.23451	Covalent modification
366	YIL008W	URM1	20.3111	8.20556	2.47529	12.3926	1.63897	Covalent modification
367	YPR052C	NHP6A	93.9074	43.2778	2.16988	44.3348	2.11814	Covalent modification
368	YKL096W-A	CWP2	47.8222	7.76667	6.15737	87.7274	0.545123	Non-covalent interaction
369	YGR037C	ACB1	58.5148	19.3333	3.02663	46.0948	1.26944	Covalent modification
370	YGR008C	STF2	41.6222	18.3889	2.26344	31.763	1.3104	Covalent modification
371	YOR298C-A	MBF1	132.774	57.2944	2.3174	35.8942	3.69904	Covalent modification
372	YBR085C-A		62.7778	26.5667	2.36303	36.0237	1.74268	Covalent modification
373	YDL085C-A		25.0037	21.2143	1.17863	14.5244	1.72149	Covalent modification
374	YDL061C	RPS29B	33.137	23.5667	1.4061	50.9185	0.650786	Non-covalent interaction
375	YLR388W	RPS29A	30.4056	23.0278	1.32039	54.5778	0.557105	Non-covalent interaction
376	YLR262C-A	TMA7	66.4704	26.8833	2.47255	34.5837	1.92201	Covalent modification
377	YLR327C	TMA10	61.5556	9.61667	6.40092	19.8756	3.09705	Covalent modification
378	YHR143W-A	RPC10	55.7407	22.3667	2.49213	23.0311	2.42024	Covalent modification
379	YMR251W-A	HOR7	103.519	16.8333	6.14961	53.6415	1.92982	Covalent modification
380	YBL071W-A	KTI11	27.2167	12.5667	2.16578	11.3481	2.39834	Covalent modification
381	YLR264W	RPS28B	57.3815	37.6889	1.5225	100.892	0.568742	Non-covalent interaction
382	YHR053C	CUP1-1	36.1481	19.25	1.87783	17.3007	2.0894	Covalent modification
383	YNL015W	PBI2	61.8852	20.1667	3.06869	21.1822	2.92156	Covalent modification
384	YOR167C	RPS28A	51.0815	32.1667	1.58803	90.0474	0.567273	Non-covalent interaction
385	YHR055C	CUP1-2	61.3704	10.3	5.95829	22.0148	2.78769	Covalent modification
386	YDL133C-A	RPL41B	88.1991	55.7389	1.58236	95.3651	0.924857	Non-covalent interaction
387	YDL184C	RPL41A	52.2249	39.7722	1.3131	51.9407	1.00547	Covalent modification
388	YGL092W	NUP145	24.2074	17.7333	1.36508	19.1333	1.2652	Covalent modification
389	YKR082W	NUP133	42.5278	23.0778	1.8428	23.3037	1.82494	Covalent modification
390	YJL041W	NSP1	45.8222	18.5159	2.47475	47.8222	0.958178	Non-covalent interaction
391	YOR270C	VPH1	58.9185	49.1833	1.19794	78.803	0.747669	Non-covalent interaction
392	YNL287W	SEC21	27.3704	25.1667	1.08756	25.1348	1.08894	Covalent modification
393	YGL137W	SEC27	44.0222	30.1667	1.4593	42.5037	1.03573	Covalent modification
394	YJR005W	APL1	31.8889	27.7556	1.14892	30.9333	1.03089	Covalent modification
395	YDR091C	RLI1	43.9074	37	1.18669	40.0859	1.09533	Covalent modification
396	YER136W	GDI1	58.7222	13.5278	4.34086	41.1496	1.42704	Covalent modification
397	YMR079W	SEC14	63.8704	13.8	4.62829	26.5452	2.4061	Covalent modification
398	YML008C	ERG6	141.567	82.6083	1.71371	104.844	1.35025	Covalent modification
399	YLR372W	SUR4	19.4571	18.35	1.06033	13.5037	1.44087	Covalent modification
400	YNL098C	RAS2	8	9.27778	0.862275	10.0444	0.79646	False-positive candidate
401	YFL045C	SEC53	136.639	29.2333	4.67408	35.9526	3.80053	Covalent modification
402	YOR332W	VMA4	70.7037	36.8278	1.91985	83.1467	0.850349	Non-covalent interaction
403	YER031C	YPT31	33.6889	19.2333	1.75159	26.0444	1.29352	Covalent modification
404	YHR039C-A	VMA10	68.2296	44.3472	1.53853	51.0163	1.33741	Covalent modification
405	YML001W	YPT7	46.0093	14.2333	3.2325	21.0726	2.18337	Covalent modification
406	YOR089C	VPS21	64.2778	17.8	3.61111	17.2267	3.7313	Covalent modification
407	YGR209C	TRX2	134.463	31.9	4.21514	60.7704	2.21264	Covalent modification
408	YLR043C	TRX1	128.611	32.3	3.98177	64.24	2.00204	Covalent modification
